# Supplementary material for: Muscle magnetic resonance imaging in myotonic dystrophy type 1 (DM1): Refining muscle involvement and implications for clinical trials
Source: PubMed Central journal article supplement — Eur J Neurol. 2021 Dec 6;29(3):843–54. doi: 10.1111/ene.15174 (PMC9299773; doi:10.1111/ene.15174), 2021-12-06
Supplement: ENE-29-843-s003.pdf [file ENE-29-843-s003.pdf]

## Supplementary Materials

### TABLES

**Table 1. T1 Scoring Scale**

| Grade | Mercuri et al. 2002                                                                                                                                                                                                                                                           | Komblum et al. 2006                                                                                                                                             | Fisher et al. 2008                                                                                        | Garibaldi et al.                                                                 |
|-------|-------------------------------------------------------------------------------------------------------------------------------------------------------------------------------------------------------------------------------------------------------------------------------|-----------------------------------------------------------------------------------------------------------------------------------------------------------------|-----------------------------------------------------------------------------------------------------------|----------------------------------------------------------------------------------|
| 0     |                                                                                                                                                                                                                                                                               | Normal appearance                                                                                                                                               | Normal appearance                                                                                         | Normal appearance                                                                |
| 1     | Normal appearance                                                                                                                                                                                                                                                             | Discrete moth-eaten appearance with sporadic T1 hyperintense area                                                                                               | Mild: traces of increased signal intensity on the T1-weighted MR equences                                 | Minimal: minimal/initial replacement (one isolated area)                         |
| 2     | Mild involvement: Early moth-eaten appearance with scattered small areas of increased signal or with numerous discrete areas of increased signal with beginning confluence, comprising less than 30% of the volume of the individual muscle                                   | a. Moderate moth-eaten appearance with numerous scattered T1 hyperintense areas<br>b. Late moth-eaten appearance with numerous confluent T1 hyper-intense areas | Moderate: increased T1-weighted signal intensity with beginning confluence in less than 50% of the muscle | Mild: <50% volume replacement                                                    |
| 3     | Moderate involvement: Late moth-eaten appearance with numerous discrete areas of increased signal with beginning confluence, comprising 30-60% of the volume of the individual muscle                                                                                         | Complete fatty degeneration, replacement of muscle by connective tissue and fat                                                                                 | Severe: increased T1-weighted signal intensity with beginning confluence in more than 50% of the muscle   | <u>Moderate</u> : ≥50% replacement                                               |
| 4     | Severe involvement: Washed-out appearance, fuzzy appearance due to confluent areas of increased signal or an end-stage appearance, with muscle replaced by increased density connective tissue and fat, and only a rim of fascia and neurovascular structures distinguishable |                                                                                                                                                                 | End-stage appearance, entire muscle replaced by increased density of connective tissue and fat            | Severe: complete replacement (≥99%);                                             |
| 5     |                                                                                                                                                                                                                                                                               |                                                                                                                                                                 |                                                                                                           | End-stage atrophy: complete muscle atrophy fibro-fatty replacement not-evaluable |

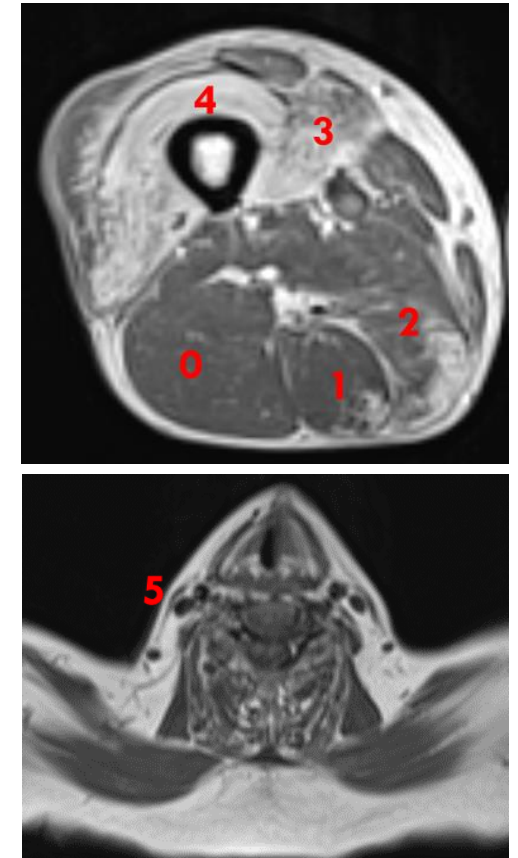

**Table 2. Atrophy Scoring system and scale**

**Lower limbs' compartments**

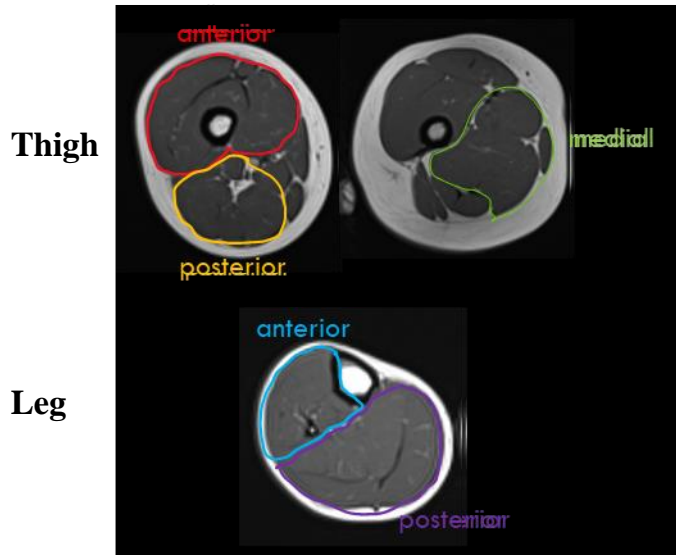

**Upper body muscles**

**Sternocleidomastoideus**

**Trapezius**

**Pectoralis**

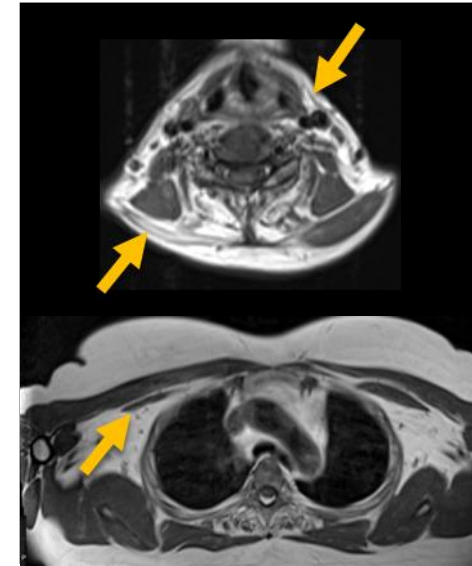

| Grade | Brojna et al.2020                  | Garibaldi et al.                       | Grade 0                                                               | Grade 1 | Grade 2 | Grade 3 | Grade 4 |
|-------|------------------------------------|----------------------------------------|-----------------------------------------------------------------------|---------|---------|---------|---------|
| 0     | Normal                             | Normal muscle bulk                     |                                                                       |         |         |         |         |
| 1     | Mild peripheral muscle volume loss | Minimal: peripheral muscle volume loss |                                                                       |         |         |         |         |
| 2     | < 50% of muscle volume loss        | Mild: < 50% of muscle volume loss      |                                                                       |         |         |         |         |
| 3     | ≥ 50% of muscle volume loss        | Moderate: ≥ 50% of muscle volume loss  |                                                                       |         |         |         |         |
| 4     |                                    | Severe: complete muscle atrophy        |                                                                       |         |         |         |         |
|       |                                    |                                        | <span style="margin-right: 150px;">Quadriceps</span> <span>SCM</span> |         |         |         |         |

**Table 3. Average and Median T1 score per muscle**

|                                                       | <b>Average<br/>T1 score</b> | <b>Median<br/>T1 score</b> |
|-------------------------------------------------------|-----------------------------|----------------------------|
| <i>Gastrocnemius Medialis</i>                         | 2,205223881                 | 3                          |
| <i>Sternocleidomastoideus</i>                         | 1,73148148                  | 0                          |
| <i>Soleus</i>                                         | 1,604477612                 | 1                          |
| <i>Flexor Hallucis Longus</i>                         | 1,425373134                 | 1                          |
| <i>Multifidus</i>                                     | 1,369402985                 | 1                          |
| <i>Genioglossus</i>                                   | 1,14285714                  | 1                          |
| <i>Paraspinous (Thoracic)</i>                         | 1,13913043                  | 1                          |
| <i>Paraspinous (Cervical)</i>                         | 1,06086957                  | 1                          |
| <i>Tibialis Anterior</i>                              | 1,041044776                 | 0                          |
| <i>Gastrocnemius Lateralis</i>                        | 0,98880597                  | 0                          |
| <i>Extensor Digitorum/Allucis Longus</i>              | 0,925373134                 | 0                          |
| <i>Vastus Intermedius</i>                             | 0,891791045                 | 1                          |
| <i>Vastus Medialis</i>                                | 0,861940299                 | 0                          |
| <i>Gluteus Minimus</i>                                | 0,850746269                 | 1                          |
| <i>Peroneus Longus/Brevis</i>                         | 0,77238806                  | 0                          |
| <i>Rectus Abdominis</i>                               | 0,76119403                  | 0                          |
| <i>Vastus Lateralis</i>                               | 0,757462687                 | 0                          |
| <i>Iliocostalis Lomborum</i>                          | 0,697761194                 | 0                          |
| <i>Tensor Fasciae Latae</i>                           | 0,679104478                 | 0                          |
| <i>Semimembranosus</i>                                | 0,611940299                 | 0                          |
| <i>Latissimus Dorsi</i>                               | 0,53913043                  | 0                          |
| <i>Sartorius</i>                                      | 0,537313433                 | 0                          |
| <i>Biceps Femoris Caput Brevis</i>                    | 0,496268657                 | 0                          |
| <i>Obliquus Ext/Int/Trasv</i>                         | 0,470149254                 | 0                          |
| <i>Pectoralis Minor</i>                               | 0,39473684                  | 0                          |
| <i>Trapezius</i>                                      | 0,33043478                  | 0                          |
| <i>Gracilis</i>                                       | 0,320895522                 | 0                          |
| <i>Tibialis Posterior/Flexor Digitorum<br/>Longus</i> | 0,317164179                 | 0                          |
| <i>Semitendinosus</i>                                 | 0,276119403                 | 0                          |
| <i>Biceps Femoris Caput Longum</i>                    | 0,25                        | 0                          |
| <i>Adductor Longus</i>                                | 0,182835821                 | 0                          |
| <i>Rectus Femoris</i>                                 | 0,171641791                 | 0                          |
| <i>Average upper body T1 score</i>                    | 0,75                        |                            |
| <i>Average lower body T1 score</i>                    | 1,47                        |                            |

\*distal-proximal gradient: 100% (83/83). Not evaluable in the remaining patients because of total muscle sparing; UL: up

**Table 4. characteristics of patients**

| Patient | Age at MRI | Age at Disease onset (ys) | Clinical form (0= cong, 1=inf, 2=juv, 3=classic, 4=late) | Disease duration | Sex (M=0, F=1) | CTG range | CTG average | Expansion_Class (1= E1; 2= E2; 3= E3) | Expansion_Class Revised (1= E1a; 2=E1b; 3= E2a; 4= E2b; 5=E2c; 6=E3a; 7=E3b) | MIRS at 1st MRI | T1  | T1 | T1  | STIR | atrophy SCM | Marble |
|---------|------------|---------------------------|----------------------------------------------------------|------------------|----------------|-----------|-------------|---------------------------------------|------------------------------------------------------------------------------|-----------------|-----|----|-----|------|-------------|--------|
|         |            |                           |                                                          |                  |                |           |             |                                       |                                                                              |                 | LL  | UL | TOT |      |             |        |
| p1      | 49         | 10                        | 1                                                        | 39               | 0              | 350-780   | 565         | 2                                     | 4                                                                            | 3               | 36  | 6  | 42  | 16   | no          | 1      |
| p2      | 43         | 0                         | 0                                                        | 43               | 0              | 570-1080  | 825         | 2                                     | 5                                                                            | 4               | 116 | 67 | 183 | 10   | yes         | 0      |
| p3      | 44         | 21                        | 3                                                        | 23               | 0              | 250       | 250         | 2                                     | 3                                                                            | 3               | 25  | 12 | 37  | 9    | 1           | 0      |
| p4      | 50         | 40                        | 3                                                        | 10               | 1              | 680-1250  | 965         | 3                                     | 5                                                                            | 4               | 90  |    |     | 1    | n.a.        | 0      |
| p5      | 53         | 40                        | 3                                                        | 13               | 1              | 785-965   | 875         | 2                                     | 5                                                                            | 4               | 118 | 40 | 158 | 0    | yes         | 0      |
| p6      | 53         | 16                        | 2                                                        | 37               | 0              | 96        | 96          | 1                                     | 1                                                                            | 4               | 114 | 44 | 158 | 8    | yes         | 0      |
| p7      | 15         | 8                         | 1                                                        | 7                | 0              | 350       | 350         | 2                                     | 3                                                                            | 1               | 2   | 0  | 2   | 0    | no          | 0      |
| p8      | 37         | 22                        | 3                                                        | 15               | 1              | 130       | 130         | 2                                     | 2                                                                            | 3               | 24  | 3  | 27  | 6    | no          | 0      |
| p9      | 25         | 20                        | 2                                                        | 5                | 1              | 50-1000   | 475         | 2                                     | 3                                                                            | 2               | 2   | 0  | 2   | 0    | no          | 0      |
| p10     | 56         | 56                        | 4                                                        | 0                | 0              | 50-85     | 70          | 1                                     | 1                                                                            | 1               | 13  | 0  | 13  | 4    | no          | 1      |
| p11     | 55         | 51                        | 4                                                        | 4                | 0              | 70        | 70          | 1                                     | 1                                                                            | 2               | 0   | 1  | 1   | 0    | no          | 1      |
| p12     | 27         | 16                        | 2                                                        | 11               | 1              | 390-500   | 445         | 2                                     | 3                                                                            | 3               | 18  | 1  | 19  | 4    | no          | 0      |
| p13     | 29         | 19                        | 2                                                        | 10               | 1              | 200-450   | 325         | 2                                     | 3                                                                            | 3               | 0   | 0  | 0   | 0    | no          | 0      |
| p14     | 54         | 18                        | 2                                                        | 36               | 0              | 1000      | 1000        | 3                                     | 6                                                                            | 4               | 108 | 48 | 156 | 10   | yes         | 0      |
| p15     | 20         | 18                        | 2                                                        | 2                | 0              | 150-1000  | 575         | 2                                     | 4                                                                            | 3               | 0   | 1  | 1   | 5    | no          | 0      |
| p16     | 57         | 47                        | 4                                                        | 10               | 0              | 90-240    | 210         | 2                                     | 3                                                                            | 4               | 112 | 34 | 146 | 8    | 2           | 0      |
| p17     | 54         | 53                        | 4                                                        | 1                | 0              | 150-1000  | 575         | 2                                     | 4                                                                            | 3               | 3   | 9  | 12  | 2    | no          | 1      |
| p18     | 26         | 0                         | 0                                                        | 26               | 1              | 1000-1500 | 1250        | 3                                     | 6                                                                            | 3               | 73  | 50 | 123 | 7    | yes         | 0      |
| p19     | 18         | 0                         | 0                                                        | 18               | 1              | 1000      | 1000        | 3                                     | 6                                                                            | 3               | 13  | 4  | 17  | 4    | no          | 0      |
| p20     | 58         | 35                        | 3                                                        | 23               | 1              | 250       | 250         | 2                                     | 3                                                                            | 5               | 140 |    |     | 4    | n.a.        | 0      |
| p21     | 35         | 10                        | 1                                                        | 25               | 0              | 372-850   | 611         | 2                                     | 4                                                                            | 3               | 23  | 0  | 23  | 11   | no          | 0      |
| p22     | 31         | 16                        | 2                                                        | 15               | 0              | 400-570   | 485         | 2                                     | 3                                                                            | 3               | 75  | 28 | 103 | 19   | no          | 0      |
| p23     | 33         | 0                         | 0                                                        | 33               | 0              | 940-1250  | 1095        | 3                                     | 6                                                                            | 3               | 6   | 8  | 14  | 7    | 1           | 1      |
| p24     | 27         | 25                        | 3                                                        | 2                | 0              | 150-1000  | 575         | 2                                     | 4                                                                            | 3               | 16  | 1  | 17  | 4    | no          | 0      |
| p25     | 57         | 57                        | 4                                                        | 0                | 0              | 50-150    | 100         | 1                                     | 2                                                                            | 1               | 0   | 3  | 3   | 2    | no          | 1      |
| p26     | 54         | 30                        | 3                                                        | 24               | 0              | 500       | 500         | 2                                     | 4                                                                            | 4               | 117 | 35 | 152 | 9    | yes         | 0      |
| p27     | 63         | 53                        | 4                                                        | 10               | 0              | 82        | 82          | 1                                     | 1                                                                            | 3               | 11  | 5  | 16  | 5    | no          | 0      |
| p28     | 55         | 25                        | 3                                                        | 30               | 0              | 120       | 120         | 1                                     | 2                                                                            | 3               | 66  | 13 | 79  | 22   | no          | 0      |
| p29     | 44         | 30                        | 3                                                        | 14               | 0              | 360       | 360         | 2                                     | 3                                                                            | 4               | 88  |    |     | 20   | n.a.        | 0      |

|     |    |    |   |    |   |           |      |   |   |   |     |    |     |    |      |   |
|-----|----|----|---|----|---|-----------|------|---|---|---|-----|----|-----|----|------|---|
| p30 | 41 | 35 | 3 | 6  | 0 | 150-1000  | 425  | 2 | 3 | 2 | 4   | 2  | 6   | 6  | no   | 1 |
| p31 | 50 | 35 | 3 | 15 | 1 | 85        | 85   | 1 | 1 | 3 | 3   | 0  | 3   | 2  | no   | 0 |
| p32 | 47 | 40 | 3 | 7  | 0 | 255-580   | 417  | 2 | 4 | 4 | 99  | 11 | 110 | 17 | no   | 1 |
| p33 | 53 | 48 | 4 | 5  | 0 | 120       | 120  | 1 | 2 | 2 | 0   | 0  | 0   | 4  | no   | 0 |
| p34 | 65 | 55 | 4 | 10 | 0 | 120       | 120  | 1 | 2 | 2 | 1   | 9  | 10  | 0  | yes  | 1 |
| p35 | 53 | 35 | 3 | 18 | 1 | 300       | 300  | 2 | 3 | 3 | 24  | 4  | 28  | 2  | no   | 0 |
| p36 | 24 | 12 | 2 | 12 | 0 | 350       | 350  | 2 | 3 | 2 | 2   | 0  | 2   | 4  | no   | 0 |
| p37 | 50 | 46 | 4 | 4  | 0 | 670       | 670  | 2 | 4 | 3 | 89  |    |     | 7  | n.a. | 0 |
| p38 | 48 | 15 | 2 | 33 | 0 | 110       | 110  | 1 | 2 | 4 | 113 | 45 | 158 | 10 | yes  | 0 |
| p39 | 30 | 30 | 3 | 0  | 0 | 150       | 150  | 1 | 2 | 2 | 2   | 0  | 2   | 0  | no   | 0 |
| p40 | 72 | 72 | 4 | 0  | 0 | 64        | 64   | 1 | 1 | 1 | 12  | 2  | 14  | 0  | no   | 1 |
| p41 | 58 | 37 | 3 | 21 | 1 | 300       | 300  | 2 | 3 | 4 | 44  | 21 | 65  | 7  | yes  | 0 |
| p42 | 76 | 30 | 3 | 46 | 0 | 500-700   | 600  | 2 | 4 | 3 | 37  | 8  | 45  | 16 | no   | 1 |
| p43 | 47 | 25 | 3 | 22 | 0 | 350       | 350  | 2 | 3 | 3 | 24  | 5  | 29  | 10 | no   | 1 |
| p44 | 46 | 30 | 3 | 16 | 1 | 180       | 180  | 2 | 2 | 3 | 36  | 8  | 44  | 15 | no   | 1 |
| p45 | 20 | 10 | 1 | 10 | 0 | 1000      | 1000 | 3 | 6 | 2 | 0   | 1  | 1   | 0  | no   | 0 |
| p46 | 54 | 25 | 3 | 29 | 0 | 450-530   | 480  | 2 | 3 | 3 | 53  | 16 | 69  | 19 | no   | 0 |
| p47 | 44 | 0  | 0 | 44 | 0 | 1250-1800 | 1525 | 3 | 7 | 3 | 96  | 34 | 130 | 6  | yes  | 0 |
| p48 | 57 | 30 | 3 | 27 | 0 | 350-800   | 575  | 2 | 4 | 3 | 96  | 24 | 120 | 2  | yes  | 0 |
| p49 | 53 | 53 | 4 | 0  | 1 | 45        | 45   | 1 | 1 | 2 | 15  | 3  | 18  | 3  | no   | 0 |
| p50 | 71 | 71 | 4 | 0  | 0 | 70        | 70   | 1 | 1 | 1 | 8   | 3  | 11  | 5  | no   | 1 |
| p51 | 53 | 19 | 2 | 34 | 1 | 500-1000  | 750  | 2 | 5 | 4 | 81  | 28 | 109 | 11 | yes  | 0 |
| p52 | 36 | 28 | 3 | 8  | 0 | 490-630   | 560  | 2 | 4 | 3 | 30  | 22 | 52  | 17 | yes  | 1 |
| p53 | 42 | 42 | 4 | 0  | 1 | 73        | 73   | 1 | 1 | 1 | 2   | 0  | 2   | 0  | no   | 0 |
| p54 | 35 | 28 | 3 | 7  | 0 | 150-1000  | 425  | 2 | 3 | 3 | 20  | 1  | 21  | 12 | no   | 0 |
| p55 | 40 | 29 | 3 | 11 | 1 | 220-365   | 292  | 2 | 3 | 3 | 25  | 5  | 30  | 8  | no   | 0 |
| p56 | 75 | 75 | 4 | 0  | 0 | 55-70     | 62   | 1 | 1 | 2 | 18  | 8  | 26  | 0  | no   | 1 |
| p57 | 81 | 81 | 4 | 0  | 1 | 50        | 50   | 1 | 1 | 2 | 37  | 8  | 45  | 0  | no   | 1 |
| p58 | 47 | 20 | 2 | 27 | 1 | 400-600   | 500  | 2 | 4 | 3 | 75  | 20 | 95  | 3  | 3    | 1 |
| p59 | 59 | 15 | 2 | 44 | 1 | 150-250   | 200  | 2 | 3 | 3 | 25  | 2  | 27  | 4  | no   | 0 |
| p60 | 48 | 25 | 3 | 23 | 0 | 80-200    | 140  | 1 | 2 | 3 | 22  | 16 | 38  | 18 | yes  | 0 |
| p61 | 36 | 17 | 2 | 19 | 0 | 130-210   | 170  | 1 | 2 | 3 | 5   | 0  | 5   | 5  | no   | 1 |
| p62 | 38 | 12 | 2 | 26 | 0 | 500       | 500  | 2 | 4 | 3 | 49  |    |     | 25 | n.a. | 0 |
| p63 | 45 | 15 | 2 | 30 | 0 | 125       | 125  | 1 | 2 | 4 | 121 | 36 | 157 | 21 | yes  | 0 |

|             |    |    |   |    |   |           |      |   |   |   |     |    |     |    |      |   |
|-------------|----|----|---|----|---|-----------|------|---|---|---|-----|----|-----|----|------|---|
| <b>p64</b>  | 47 | 44 | 4 | 3  | 0 | >350      | 350  | 2 | 3 | 3 | 49  | 27 | 76  | 20 | yes  | 0 |
| <b>p65</b>  | 43 | 35 | 3 | 8  | 1 | >350      | 350  | 2 | 3 | 3 | 93  | 38 | 131 | 10 | yes  | 0 |
| <b>p66</b>  | 74 | 68 | 4 | 6  | 0 | 85        | 85   | 1 | 1 | 2 | 36  | 16 | 52  | 7  | no   | 0 |
| <b>p67</b>  | 22 | 16 | 2 | 6  | 1 | 85-150    | 117  | 1 | 2 | 1 | 2   | 0  | 2   | 3  | no   | 0 |
| <b>p68</b>  | 31 | 5  | 1 | 26 | 0 | 400       | 400  | 2 | 3 | 3 | 19  | 7  | 26  | 18 | no   | 0 |
| <b>p69</b>  | 33 | 27 | 3 | 6  | 1 | 150-1000  | 425  | 2 | 3 | 3 | 42  | 7  | 49  | 13 | no   | 0 |
| <b>p70</b>  | 23 | 10 | 1 | 13 | 0 | 489       | 489  | 2 | 3 | 2 | 4   | 5  | 9   | 6  | no   | 1 |
| <b>p71</b>  | 53 | 12 | 2 | 41 | 1 | 550       | 550  | 2 | 4 | 4 | 119 | 36 | 155 | 6  | yes  | 0 |
| <b>p72</b>  | 46 | 30 | 3 | 16 | 1 | >170      | 170  | 2 | 2 | 4 | 23  | 5  | 28  | 7  | no   | 0 |
| <b>p73</b>  | 57 | 35 | 3 | 22 | 1 | >170      | 170  | 2 | 2 | 4 | 30  | 2  | 32  | 6  | no   | 0 |
| <b>p74</b>  | 42 | 10 | 1 | 32 | 0 | 300       | 300  | 2 | 3 | 3 | 27  | 7  | 34  | 11 | no   | 0 |
| <b>p75</b>  | 44 | 18 | 2 | 26 | 0 | >170      | 170  | 2 | 2 | 3 | 128 | 60 | 188 | 20 | yes  | 0 |
| <b>p76</b>  | 34 | 29 | 3 | 5  | 1 | 667       | 667  | 2 | 4 | 2 | 5   | 1  | 6   | 0  | no   | 0 |
| <b>p77</b>  | 36 | 16 | 2 | 20 | 0 | 50-150    | 100  | 1 | 2 | 2 | 9   |    |     | 2  | n.a. | 0 |
| <b>p78</b>  | 48 | 39 | 3 | 9  | 0 | 91        | 91   | 1 | 1 | 2 | 1   | 12 | 13  | 1  | yes  | 0 |
| <b>p79</b>  | 39 | 25 | 3 | 14 | 1 | 165-330   | 250  | 2 | 3 | 2 | 4   | 11 | 15  | 2  | yes  | 0 |
| <b>p80</b>  | 54 | 28 | 3 | 26 | 1 | 250       | 250  | 2 | 3 | 2 | 97  | 22 | 119 | 0  | yes  | 0 |
| <b>p81</b>  | 40 | 27 | 3 | 13 | 0 | 400-630   | 515  | 2 | 4 | 3 | 31  |    |     | 11 | n.a. | 0 |
| <b>p82</b>  | 48 | 5  | 1 | 43 | 1 | 350       | 350  | 2 | 3 | 3 | 49  | 22 | 71  | 13 | yes  | 0 |
| <b>p83</b>  | 43 | 30 | 3 | 13 | 0 | 120-350   | 235  | 2 | 3 | 3 | 14  |    |     | 2  | n.a. | 0 |
| <b>p84</b>  | 29 | 20 | 2 | 9  | 0 | 200       | 200  | 2 | 3 | 2 | 9   | 0  | 9   | 3  | n.a. | 0 |
| <b>p85</b>  | 24 | 16 | 2 | 8  | 0 | 700       | 700  | 2 | 4 | 2 | 2   | 0  | 2   | 0  | no   | 0 |
| <b>p86</b>  | 35 | 10 | 1 | 25 | 1 | 415-935   | 675  | 2 | 4 | 4 | 97  | 13 | 110 | 24 | no   | 0 |
| <b>p87</b>  | 72 | 60 | 4 | 12 | 0 | >350      | 350  | 2 | 3 | 2 | 60  | 22 | 82  | 4  | yes  | 0 |
| <b>p88</b>  | 41 | 11 | 2 | 30 | 1 | 250-1100  | 675  | 2 | 4 | 3 | 79  | 32 | 111 | 10 | yes  | 0 |
| <b>p89</b>  | 60 | 30 | 3 | 30 | 1 | 288-389   | 338  | 2 | 3 | 4 | 42  |    |     | 12 | n.a. | 0 |
| <b>p90</b>  | 43 | 33 | 3 | 10 | 1 | 1000-1400 | 1200 | 3 | 6 | 4 | 53  |    |     | 14 | n.a. | 0 |
| <b>p91</b>  | 41 | 17 | 2 | 24 | 1 | 250       | 250  | 2 | 3 | 3 | 44  |    |     | 3  | n.a. | 0 |
| <b>p92</b>  | 59 | 40 | 3 | 19 | 0 | 55-3395   | 1725 | 3 | 7 | 2 | 20  | 1  | 21  | 9  | no   | 0 |
| <b>p93</b>  | 46 | 38 | 3 | 8  | 0 | 250       | 250  | 2 | 3 | 4 | 82  | 27 | 109 | 13 | yes  | 0 |
| <b>p94</b>  | 51 | 16 | 2 | 35 | 0 | >350      | 350  | 2 | 3 | 4 | 51  | 15 | 66  | 2  | yes  | 0 |
| <b>p95</b>  | 28 | 27 | 3 | 1  | 0 | >250      | 250  | 2 | 3 | 2 | 9   | 5  | 14  | 8  | n.a. | 0 |
| <b>p96</b>  | 39 | 19 | 2 | 20 | 0 | 300-450   | 375  | 2 | 3 | 3 | 2   | 0  | 2   | 4  | n.a. | 0 |
| <b>p97</b>  | 41 | 28 | 3 | 13 | 0 | 100-275   | 187  | 2 | 2 | 3 | 18  |    |     | 1  | n.a. | 1 |
| <b>p98</b>  | 42 | 15 | 2 | 27 | 0 | 400       | 400  | 2 | 3 | 3 | 20  | 2  | 22  | 1  | n.a. | 0 |
| <b>p99</b>  | 56 | 13 | 2 | 43 | 1 | 335-650   | 490  | 2 | 3 | 4 | 111 | 12 | 123 | 23 | n.a. | 0 |
| <b>p100</b> | 35 | 15 | 2 | 20 | 1 | 210       | 210  | 2 | 3 | 2 | 33  | 4  | 37  | 7  | no   | 0 |

|             |    |    |   |    |   |          |     |   |   |   |    |    |     |    |      |   |
|-------------|----|----|---|----|---|----------|-----|---|---|---|----|----|-----|----|------|---|
| <b>p101</b> | 53 | 40 | 3 | 13 | 1 | 74       | 74  | 1 | 1 | 2 | 4  | 0  | 4   | 2  | no   | 0 |
| <b>p102</b> | 54 | 50 | 4 | 4  | 0 | 130-350  | 240 | 2 | 3 | 3 | 15 | 4  | 19  | 2  | no   | 1 |
| <b>p103</b> | 42 | 30 | 3 | 12 | 1 | 20-200   | 110 | 2 | 2 | 4 | 67 |    |     | 18 | n.a. | 0 |
| <b>p104</b> | 44 | 20 | 2 | 24 | 0 | 75-330   | 202 | 2 | 3 | 2 | 1  |    |     | 2  | n.a. | 0 |
| <b>p105</b> | 22 | 15 | 2 | 7  | 0 | 220-600  | 211 | 2 | 3 | 2 | 2  | 1  | 3   | 0  | no   | 0 |
| <b>p106</b> | 22 | 8  | 1 | 14 | 1 | 500-1000 | 750 | 2 | 5 | 2 | 1  |    |     | 9  | n.a. | 0 |
| <b>p107</b> | 55 | 46 | 4 | 9  | 1 | 170      | 170 | 2 | 2 | 2 | 0  | 0  | 0   | 0  | no   | 0 |
| <b>p108</b> | 34 | 22 | 3 | 12 | 0 | >350     | 350 | 2 | 3 | 3 | 11 | 1  | 12  | 0  | no   | 0 |
| <b>p109</b> | 61 | 60 | 4 | 1  | 0 | >400     | 400 | 2 | 3 | 2 | 58 | 12 | 70  | 11 | n.a. | 0 |
| <b>p110</b> | 34 | 20 | 2 | 14 | 1 | >400     | 400 | 2 | 3 | 1 | 20 |    |     | 8  | n.a. | 0 |
| <b>p111</b> | 51 | 47 | 4 | 4  | 1 | 380      | 380 | 2 | 3 | 2 | 28 | 13 | 41  | 3  | no   | 0 |
| <b>p112</b> | 68 | 40 | 3 | 28 | 0 | 200      | 299 | 2 | 3 | 3 | 90 | 21 | 111 | 7  | yes  | 0 |
| <b>p113</b> | 39 | 39 | 3 | 0  | 0 | 80-145   | 112 | 1 | 2 | 2 | 43 | 10 | 53  | 5  | no   | 0 |
| <b>p114</b> | 22 | 8  | 1 | 14 | 0 | 200-400  | 300 | 2 | 3 | 2 | 0  | 0  | 0   | 2  | no   | 0 |
| <b>p115</b> | 49 | 15 | 2 | 34 | 0 | 333-900  | 616 | 2 | 4 | 4 | 65 | 17 | 82  | 20 | yes  | 0 |
| <b>p116</b> | 60 | 30 | 3 | 30 | 0 | >250     | 250 | 2 | 3 | 4 | 73 | 13 | 86  | 2  | n.a. | 1 |
| <b>p117</b> | 29 | 15 | 2 | 14 | 1 | >350     | 350 | 2 | 3 | 3 | 39 | 0  | 39  | 3  | no   | 1 |
| <b>p118</b> | 51 | 15 | 2 | 36 | 0 | 300      | 300 | 2 | 3 | 4 | 68 | 28 | 96  | 10 | yes  | 0 |
| <b>p119</b> | 47 | 45 | 4 | 2  | 0 | >400     | 400 | 2 | 3 | 3 | 55 | 20 | 75  | 1  | yes  | 0 |
| <b>p120</b> | 48 | 48 | 4 | 0  | 0 | 91       | 91  | 1 | 1 | 1 | 6  |    |     | 3  | n.a. | 0 |
| <b>p121</b> | 49 | 35 | 3 | 14 | 0 | 90-250   | 170 | 2 | 2 | 2 | 30 |    |     | 4  | n.a. | 0 |
| <b>p122</b> | 49 | 44 | 4 | 5  | 0 | 110-300  | 220 | 2 | 3 | 3 | 26 | 4  | 30  | 4  | no   | 0 |
| <b>p123</b> | 71 | 60 | 4 | 11 | 1 | 130-350  | 240 | 2 | 3 | 3 | 14 | 8  | 22  | 3  | no   | 0 |
| <b>p124</b> | 38 | 15 | 2 | 23 | 1 | 1100     | 110 | 1 | 2 | 3 | 65 | 9  | 74  | 17 | no   | 0 |
| <b>p125</b> | 50 | 30 | 3 | 20 | 1 | 300-1100 | 700 | 2 | 4 | 4 | 67 | 21 | 88  | 21 | yes  | 0 |
| <b>p126</b> | 68 | 33 | 3 | 35 | 1 | 200-300  | 250 | 2 | 3 | 4 | 56 |    |     | 16 | n.a. | 0 |
| <b>p127</b> | 12 | 5  | 1 | 7  | 0 | >400     | 400 | 2 | 3 | 3 | 2  | 0  | 2   | 0  | no   | 0 |
| <b>p128</b> | 57 | 45 | 4 | 12 | 0 | 115-250  | 180 | 2 | 2 | 4 | 33 | 17 | 50  | 12 | yes  | 1 |
| <b>p129</b> | 46 | 8  | 1 | 38 | 1 | 730      | 730 | 2 | 4 | 4 | 67 | 25 | 92  | 2  | yes  | 1 |
| <b>p130</b> | 49 | 40 | 3 | 9  | 1 | >350     | 350 | 2 | 3 | 4 | 9  | 4  | 13  | 1  | no   | 0 |
| <b>p131</b> | 20 | 18 | 2 | 2  | 0 | >200     | 200 | 2 | 3 | 2 | 0  | 11 | 11  | 0  | yes  | 0 |
| <b>p132</b> | 68 | 65 | 4 | 3  | 1 | 125-140  | 262 | 2 | 3 | 4 | 32 | 2  | 34  | 4  | no   | 1 |
| <b>p133</b> | 51 | 40 | 3 | 11 | 1 | >300     | 300 | 2 | 3 | 4 | 94 | 25 | 119 | 12 | yes  | 0 |
| <b>p134</b> | 73 | 55 | 4 | 18 | 1 | 75-350   | 212 | 2 | 3 | 1 | 12 | 5  | 17  | 0  | no   | 0 |
